# Supplementary material for: Krüppel-like Factors Hypertrophy Modulation Following Isoproterenol-Induced Myocardial Damage
Source: Preprints.org preprint supplement (doi:10.20944/preprints202308.2187.v1), 2023-08-31
Supplement: Supplementary file 1 [file Primer list.docx]

Supplemental Table 1. Primer List

| Gen | 5´FWD | 5´REV |
| --- | --- | --- |
| KLF-1 | AGACTGTCTTACCCTCCATCAG | GGTCCTCTGATTTCAGACTCAC |
| KLF-2 | CTCAGCGAGCCTATCTTGCC | CACGCTGTTTAGGTCCTCATCC |
| KLF-3 | GAAGCCCAACAAATATGGGGT | GACAAGGAGACCATGAGAGG |
| KLF-4 | GTGCCCCGACTAACCGTTG | TCGTTGAACTCCTCGGTCT |
| KLF-5 | CCGGAGACGATCTGAAACACG | GTTGATGCTGTAAGGTAAGCCT |
| KLF-6 | GTTTCTGCTCCGACTCCTGAT | TTCCTGGAAGATGCTACACATTG |
| KLF-7 | TCCACGACACCGGCTACTT | GGGAGCAGCAAGGGGTCTA |
| KLF-8 | GATTCGATGGAGGTATTCAAA | AACAGAGCTGGGTTCTCCATT |
| KLF-9 | GCCGCCTACATGGACTTCG | GCCGTTCACCTGTATGCAC |
| KLF-10 | ATGCTTAACTTCGGCGCTT | CGCTTCCACAGCTTCAAAG |
| KLF-11 | CATGGACATTTGTGAGTCAATCC | CCTTTGGTAGATCAGGTGCAG |
| KLF-12 | CAAGGGTCTCCAAACGTCCAC | TGATCTACAGGCAATGAGTCC |
| KLF-14 | CTCCGTGTGCCTCAACAAGCTGC | CAGGCGCACCCAGGATAGC |
| KLF-15 | GAGACCTTCTCGTCACCGAAA | GCTGGAGACATCGCTGTCAT |
| KLF-16 | ATCCTGGCCGATCTGAGAGG | GTGCGAAGACTTGTAATAGGCT |
| KLF-17 | TTCCTGTGGAGTCTCAGTGAT | CGAGTGCAACATCTGATTCATA |
| GATA4 | CCCTACCCAGCCTACATGG | ACATATCGAGATTGGGGTGTCT |
| MEF2C | ATGCCATCAGTGAATCAAAGGAT | GTGGTACGGTCTCCCAACT |
| TBX5 | AATGGTCCGTAACTGGTAAAG | GGATAATGTGTCCGAATGGGTC |
| COL1A1 | GCTCCTCTTAGGGGCCACT | GGGTCCCTCGACTCCTATGA |
| GAPDH | AGGTCGGTGTGAACGGATTTG | TGTAGACCATGTAGTTGAGGTCA |
| RYR2 | ACCGCAACCATCCACAAAG | AAAGTCTGTTGCCAAATCCTCCT |
| CX43 | ACAGCTGTTGAGTCAGCTTG | GAGAGATGGGGAAGGACTTGT |
| TNF-B | CCACCTCCTGAGGGTGCTTAGC | GCCATGTCGGAGAAAGGCGC |
| BMP2 | GGGACCCGCTGTCTTCTAGT | TCAACTCAAACTCGCTGAGGAC |
| NPPA | GCTCCCAGGCCATATTGGAG | GGAGGCATGACCTCACTTC |
| CACNA1G | AGATCCCTCTAGCTGAGATGGA | GGGCACTAAGTAAGAGTGTGTG |
